# Supplementary material
Source: PubMed Central journal article supplement (PMC4724467)
Supplement: NIHMS740397-supplement-1.pdf [file NIHMS740397-supplement-1.pdf]

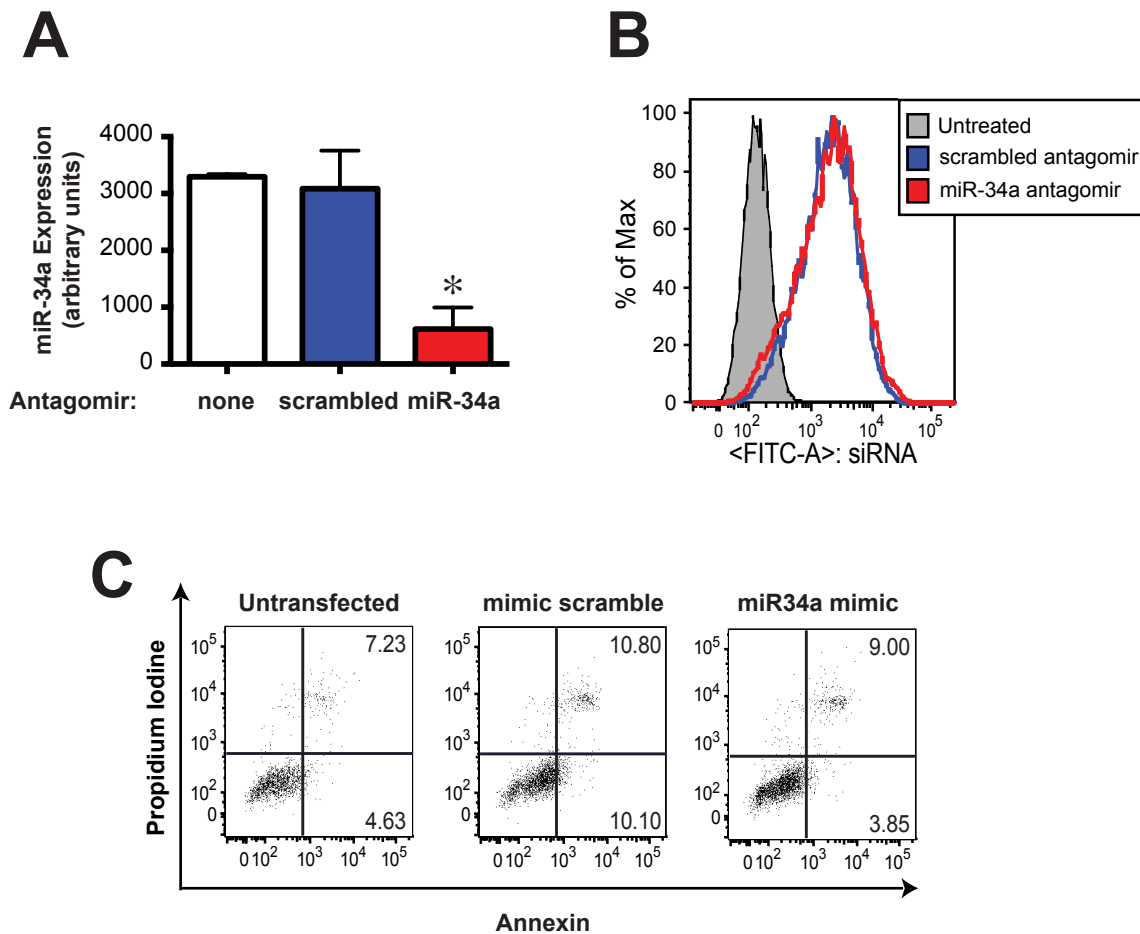

**Supplemental Figure 1. Efficacy of Mø transfection to manipulate miR-34a expression without impacting viability**

A. Resident murine AMø were transfected with control or miR-34a-specific antagomirs using RNAiMAX lipofectamine for 24 h, then RNA was harvested and assayed for miR-34a expression relative to sno-142 using quantitative real-time RT-PCR. Data are mean  $\pm$  SEM from n=3-7 mice from one or more experiments; \*, statistically significant,  $p < 0.05$  by one-way ANOVA with Bonferroni post-hoc testing. B. Resident murine AMø were transfected with fluorescein-labeled control antagomirs or miR-34a-specific antagomirs using RNAiMAX lipofectamine for 24 h, then analyzed by flow cytometry, gating on all CD45+ cells. Stacked overlays of histograms showing FITC fluorescence, representative of two experiments with similar results. C. Resident murine PMø were transfected with control mimics or miR-34a-specific mimics using RNAiMAX lipofectamine for 24 h, then viability was assayed by annexin-FITC and propidium iodine staining and flow cytometry; numbers show the percentage of events in that quadrant. Representative of two experiments with similar results.

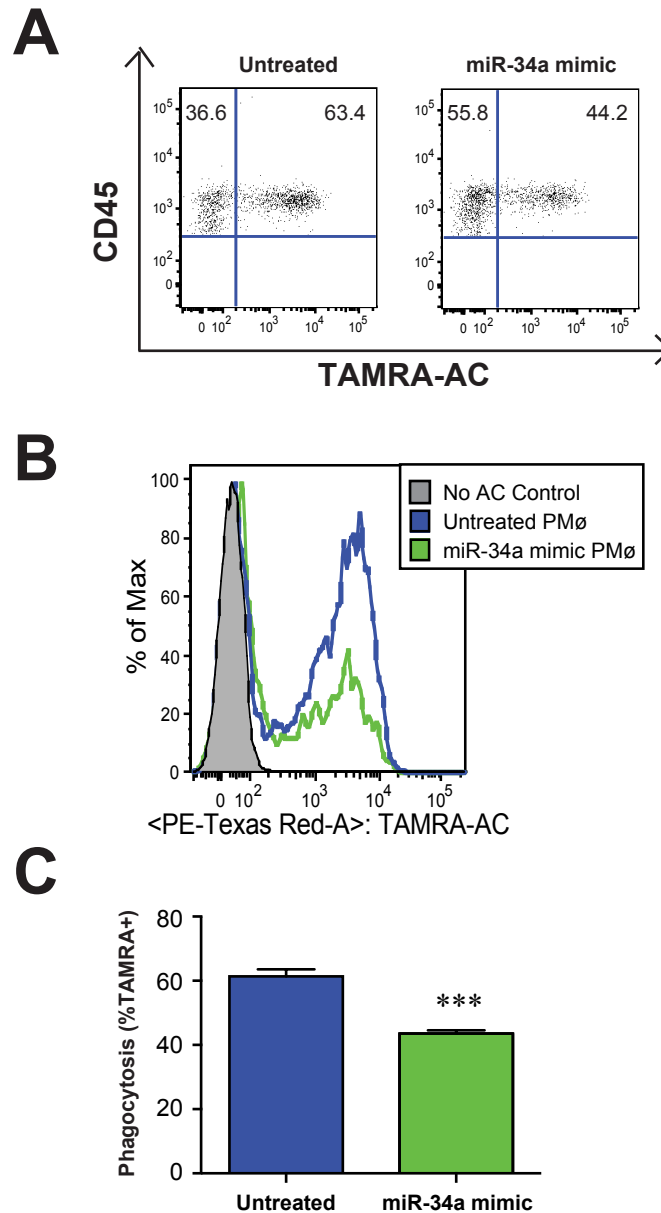

**Supplemental Figure 2. Flow cytometric confirmation that miR-34a negatively regulates efferocytosis.**

PMØ were transfected with control or miR-34a-specific mimics using RNAiMAX lipofectamine for 48 h, then exposed to TAMRA-labeled AC for 1 h. PMØ were removed from culture, surface-stained with CD45, then analyzed by flow cytometry.

A. Representative dot plot of AC engulfment showing CD45<sup>+</sup> versus TAMRA<sup>+</sup> staining on CD45<sup>+</sup> gated cells; numbers show the percentage of events in that quadrant.

B. Representative histogram showing TAMRA<sup>+</sup> staining on CD45<sup>+</sup> gated cells.

C. AC uptake measured as percent of TAMRA<sup>+</sup> cells. Data shown are mean  $\pm$  SEM from n=2-4 mice assayed individually in each of two independent experiments.

\*\*\*, statistically significant,  $p < 0.0001$  by unpaired Student t test.

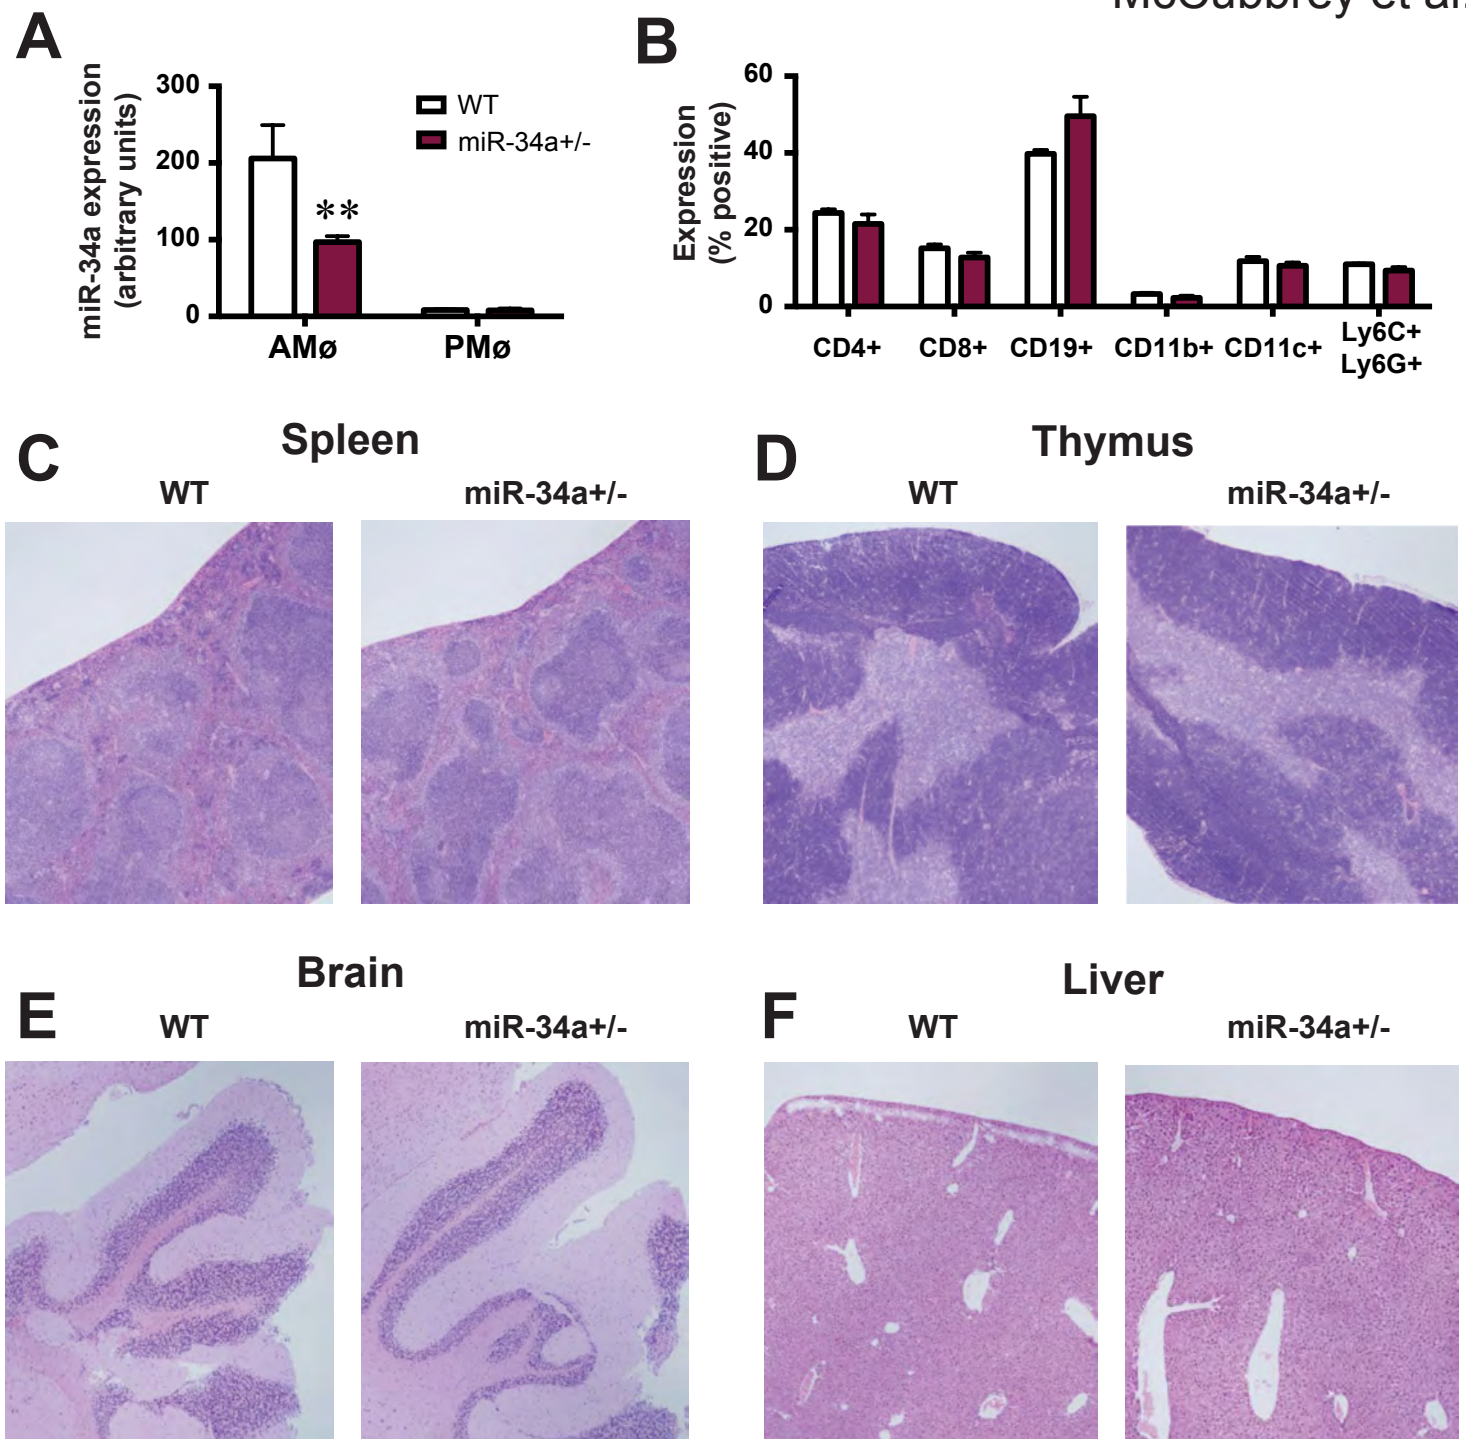

**Supplemental Figure 3. Phenotype of MiR-34a<sup>+/-</sup> mice.**

MiR-34a<sup>fl</sup> mice were crossed with LysM cre mice to develop miR-34a<sup>fl</sup>/- LysM cre mice (miR-34a<sup>+/-</sup>). A. Resident AMØ and PMØ were harvested from miR-34a<sup>+/-</sup> mice (red) and wt C57BL/6 mice (WT) (white), total RNA was harvested and assessed for miR-34a expression, relative to sno-142, using quantitative real-time RT-PCR. Data are mean ± SEM of 6 mice of each genotype assayed individually in two independent experiments. \*\*, statistically significant, p<0.01 by one-way ANOVA with Bonferroni post-hoc testing. B. Splenocytes were stained with mAbs and analyzed by flow cytometry, gating on CD45<sup>+</sup> cells. Data are mean ± SE of 3 mice of each genotype. C-F. Various organs were harvested from wt mice and miR-34a<sup>+/-</sup> mice, processed for histology using paraffin-embedding and H&E staining. Representative examples of 3 mice of each genotype are shown at 40X final magnification; (C) spleen, (D) thymus, (E) brain, (F) liver.

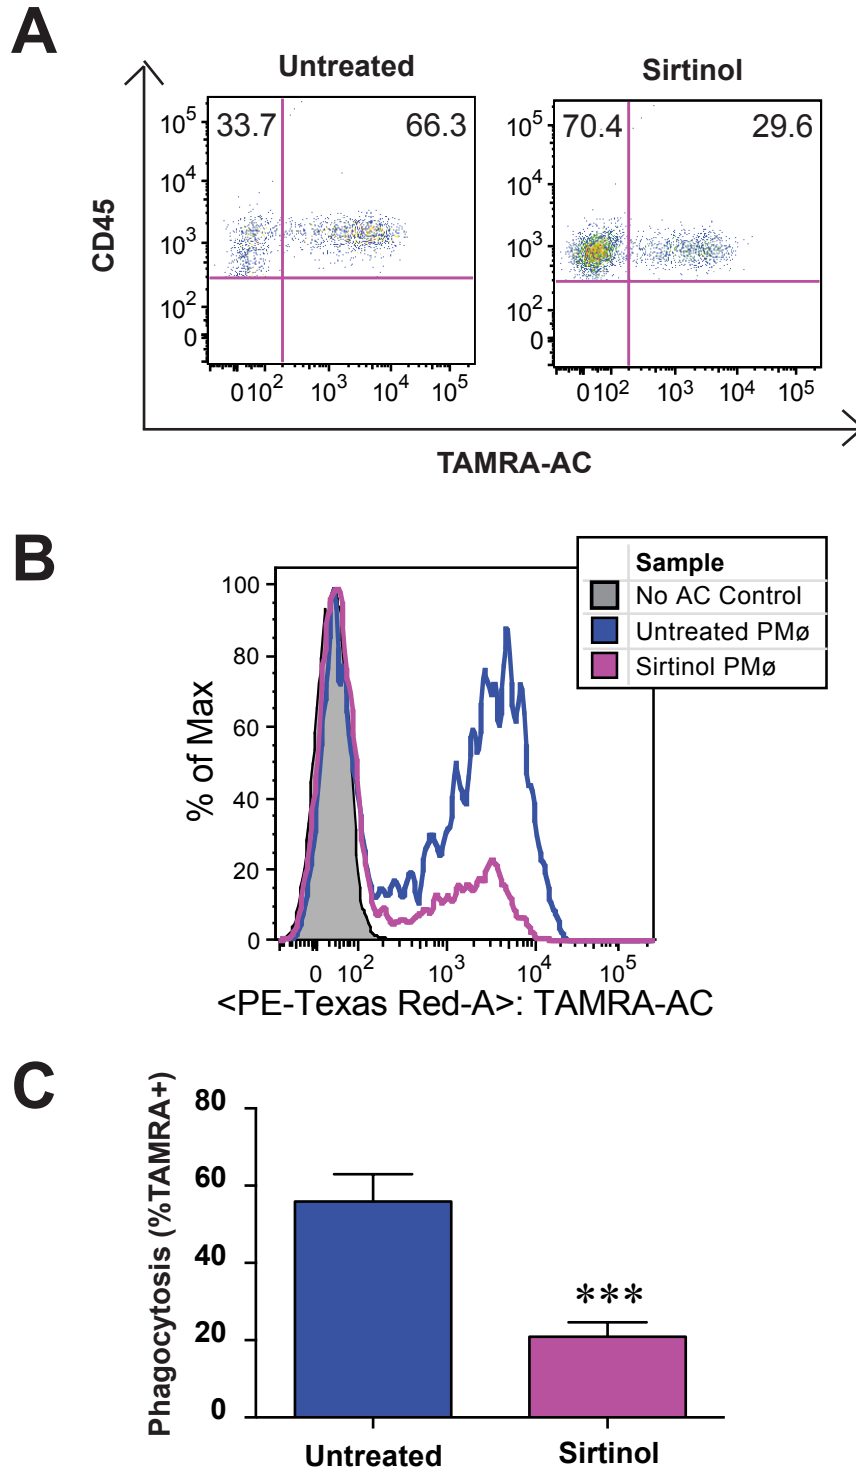

**Supplemental Figure 4. Flow cytometric analysis confirms that sirtinol inhibits efferocytosis.**

PMØ were treated with 10  $\mu$ M Sirtinol for 24 h, then exposed to TAMRA-labeled apoptotic thymocytes for 1 h. PMØ were removed from culture and surface stained with CD45, then assessed by flow cytometry. A. Representative dot plot of apoptotic cell engulfment showing CD45+ versus TAMRA+ staining on CD45+ gated cells. B. Representative histogram showing TAMRA+ staining on CD45+ gated cells. C. Quantified uptake measured as percentage of TAMRA+ cells. Data are mean  $\pm$  SEM of n=5 mice, assayed individually in four independent experiments. \*\*, statistically significant, p<0.0001 by paired Student t test.
